# Supplementary material
Source: PubMed Central journal article supplement (PMC7269497)
Supplement: AAC.00385-20-s0001.pdf [file AAC.00385-20-s0001.pdf]

```

$PROBLEM IV INFUSION TWO COMPARTMENT SS
$INPUT ID TIME AMT DV RATE SS II MDV SEX AGE PCTQ PCTH ALT AST
ALB TBIL CR CRP WBC NP HGB PLT CRCL HT WT BMI CRRT ECMO
$DATA IMPN_TDM+ICU200208.csv IGNORE=@
$$SUBROUTINES ADVAN3 TRANS4
$PK
TVCL = THETA(1)
TVV1 = THETA(2)
TVQ = THETA(3)
TVV2 = THETA(4)
NCRCL=CRCL
IF (CRCL.EQ.0) NCRCL=59.1
NWT=WT
IF (WT.EQ.0) NWT=65
CL = TVCL*(NCRCL/59.1)**(THETA(5))*(NWT/65)**(THETA(6))*(THETA(7))**ECMO*
EXP(ETA(1))
V1 = TVV1 * EXP(ETA(2))
Q = TVQ * EXP(ETA(3))
V2 = TVV2 * EXP(ETA(4))
K = CL/V1
K12= Q/V1
K21= Q/V2
S1=V1
$ERROR
DEL=0
IF (F.LE.0.0001) DEL=1
IPRED=F
W1= 1
W2= F
IRES= DV-IPRED
IWRES=IRES/(W1+W2)
Y = F + W1*ERR(1) + W2*ERR(2)
$THETA
(0.2,7.63,20) ; 1 : [CL]
(8,18.7,50) ; 2 : [V1]
(0.2,3.98,10) ; 1 : [Q]
(1,9.96,50) ; 2 : [V2]
(0.1,0.243,1) ; 1 : CRCL ON [CL]
(0.1,0.865,1) ; 1 : WT ON [CL]
(0.1,1.3,10);ECMO ON CL
$OMEGA BLOCK(2)
0.1 ;IIV CL
0.01 ; IIV CL V1
0.1 ;IIV V1
$SIGMA
0 FIX ;IIV Q
0 FIX ;IIV V2
$SIGMA
0.015; [A] sigma(1,1)
0.093; [P] sigma(2,2)
$EST METHOD=1 INTER MAXEVAL=2000 NOABORT SIG=3 PRINT=1 MSFO=run0087.msfl2
$COV
$TABLE ID TIME CL V1 Q V2 K K12 K21 ETA1 ETA2 ETA3 ETA4 ONEHEADER NOPRINT
FILE=patab0087
$TABLE AGE PCTQ PCTH ALT AST ALB TBIL CR WBC NP HGB PLT CRCL HT WT BMI ONEHEADER
NOPRINT FILE=cotab0087
$TABLE SEX CRRT ECMO ONEHEADER NOPRINT FILE=catab0087
$TABLE ID IPRED IWRES CWRES ONEHEADER NOPRINT FILE=sdtab0087
$TABLE ID CL V1 Q V2 K K12 K21 FIRSTONLY NOAPPEND NOPRINT FILE=0087.par
$TABLE ID ETA1 ETA2 ETA3 ETA4 FIRSTONLY NOAPPEND NOPRINT FILE=0087.eta

```

**FIG S1** The control file of the final model.

**TABLE S1** Simulated PTA with administered of 500mg (Q8h) of imipenem for 70 %  $fT > MIC$  at different levels of CRCL 20,40,70,100 ml/min and WT 50, 65, 80kg (10<sup>th</sup>, 50<sup>th</sup>, 90<sup>th</sup>)

| MIC<br>( $\mu\text{g/mL}$ ) | CRCL(ml/min) |      |      |      | WT(kg) |      |      |
|-----------------------------|--------------|------|------|------|--------|------|------|
|                             | 20           | 40   | 70   | 100  | 50     | 65   | 80   |
| 0.0625                      | 100          | 100  | 100  | 99.9 | 100    | 100  | 100  |
| 0.125                       | 100          | 100  | 99.7 | 99.5 | 100    | 99.9 | 99.7 |
| 0.25                        | 99.8         | 99.7 | 99.1 | 97.9 | 99.5   | 99.0 | 99.0 |
| 0.5                         | 99.5         | 98.2 | 94.2 | 89.1 | 97.5   | 95.9 | 94.3 |
| 1                           | 97.0         | 89.1 | 78.5 | 69.9 | 86.3   | 82.4 | 76.9 |
| 2                           | 82.6         | 65.6 | 45.1 | 35.2 | 62.2   | 52.3 | 44.7 |
| 4                           | 47.4         | 27.4 | 14.9 | 9.8  | 25.4   | 18.5 | 14.3 |
| 8                           | 12.5         | 5.1  | 1.4  | 0.7  | 4.2    | 2.0  | 1.2  |
| 16                          | 0.9          | 0.1  | 0    | 0    | 0.3    | 0    | 0    |
| 32                          | 0            | 0    | 0    | 0    | 0      | 0    | 0    |
